# Supplementary material for: Inhalation of lung spheroid cell secretome and exosomes promotes lung repair in pulmonary fibrosis
Source: PubMed Central journal article supplement (PMC7048814; doi:10.1038/s41467-020-14344-7), 2020-02-28
Supplement: 41467_2020_14344_MOESM1_ESM.pdf [file 41467_2020_14344_MOESM1_ESM.pdf]

## **Supplementary Information**

# **Lung Spheroid Cell-Secreted Factors Promotes Alveolar Repair and Attenuates Pulmonary Fibrosis**

Dinh et al.



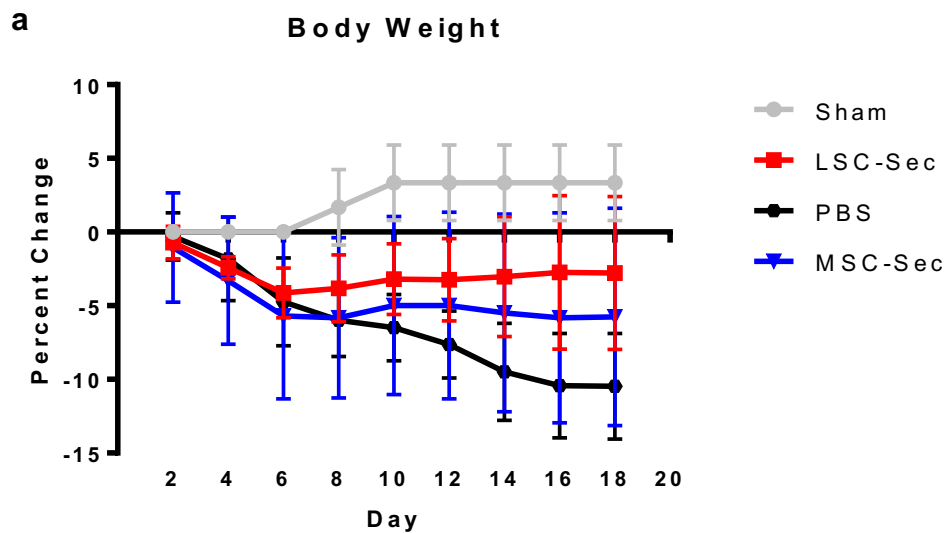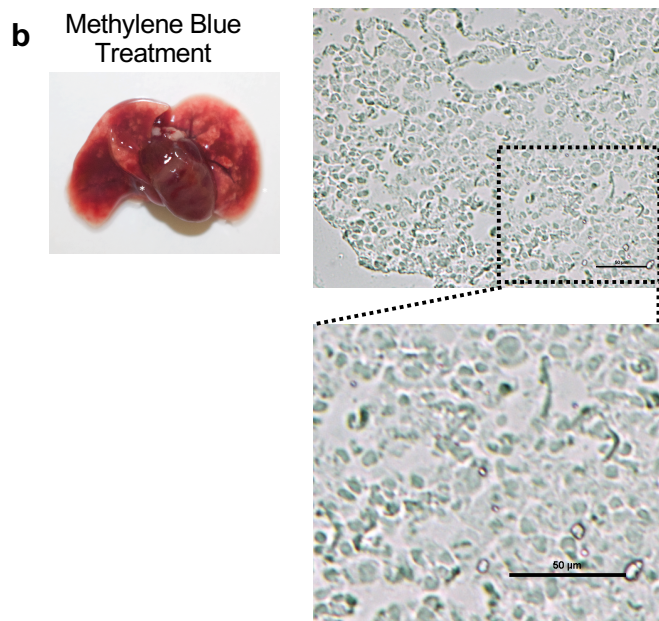

**Supplementary Figure 1. Preliminary proof of concept for inhalation treatment of bleomycin pulmonary fibrosis model.** (a) CD1 mice body weight measures throughout the study. (b) Methylene blue nebulization experiment in CD1 mice. Left: explanted mice lung and heart. Right: Unstained cryosectioned lung tissue. Scale bar= 50 µm.

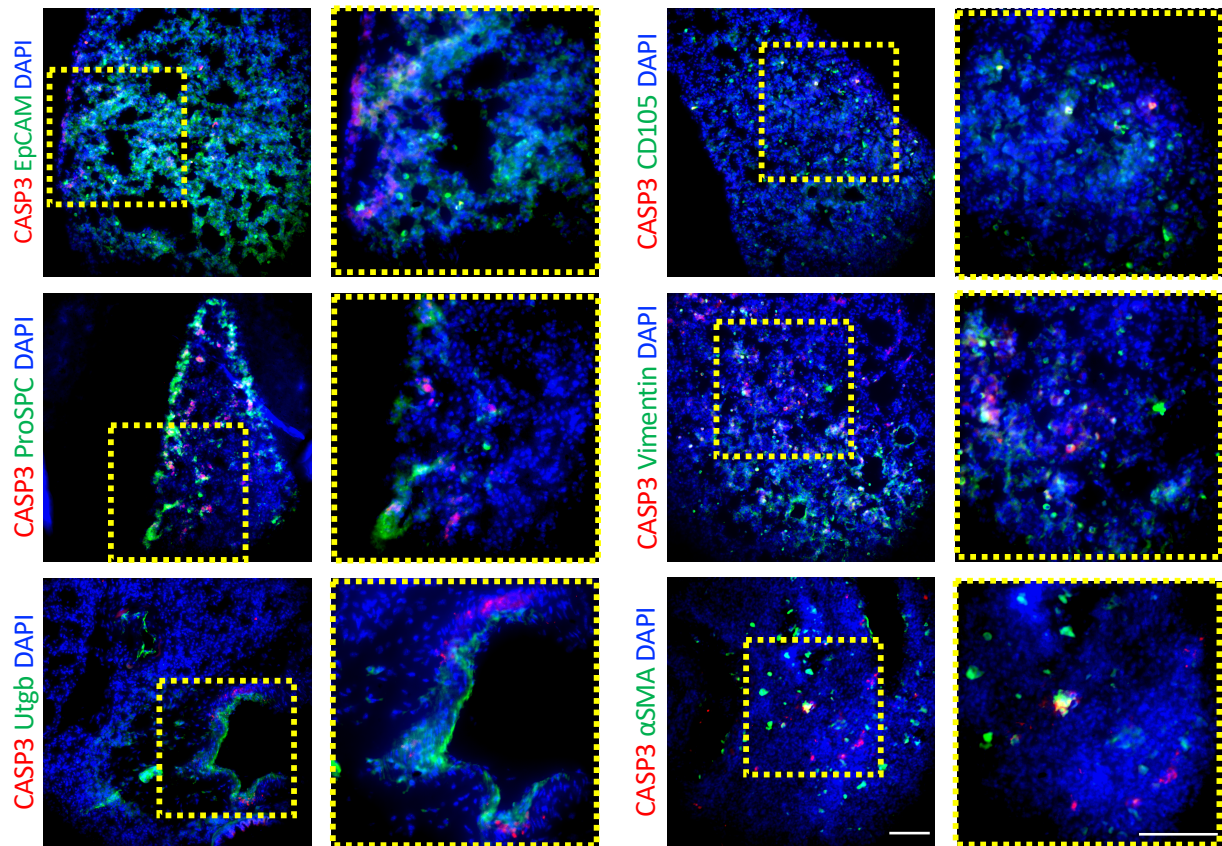

**Supplementary Figure 2. LSC-secretome study immunostained analysis of apoptotic cells.**

Representative Caspase 3 immunostaining of apoptotic cells co-stained with epithelial cell adhesion molecule (EpCAM), prosurfactant protein C (Pro-SPC/Sftpc), uteroglobin (Utgb/Scgb1a1), CD105, vimentin, and alpha smooth muscle actin ( $\alpha$ SMA) in lung tissues of mice post-bleomycin lung injury. Scale bars= 100 $\mu$ m

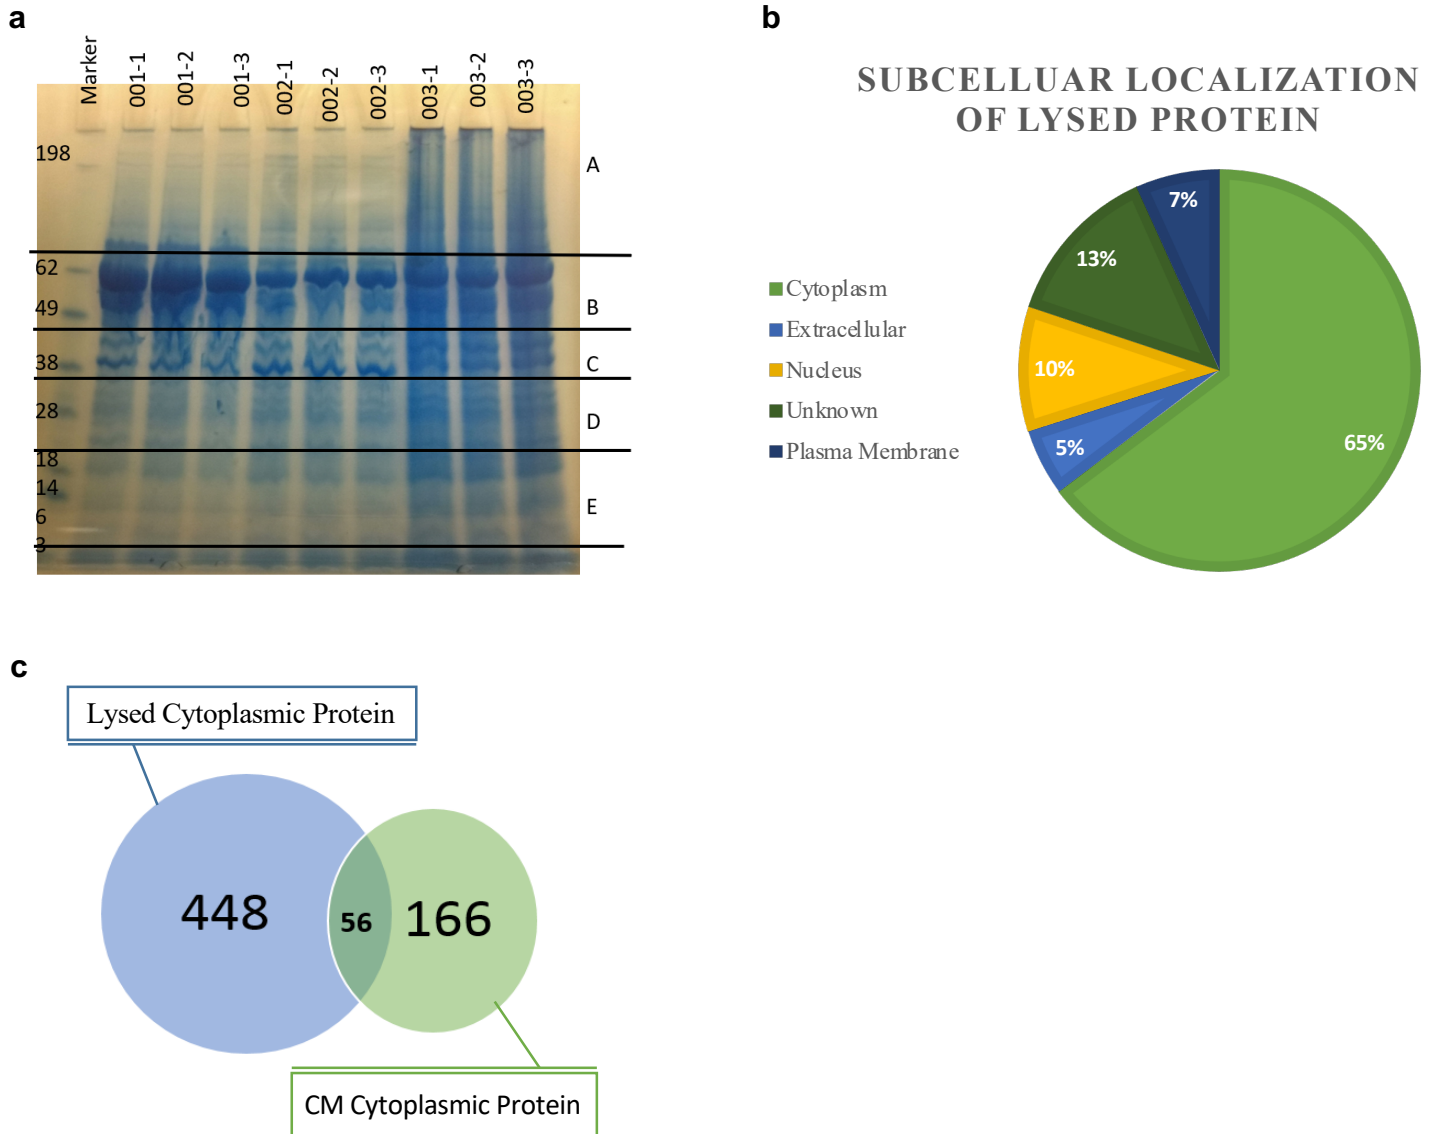

**Supplementary Figure 3. Proteomic analysis of lysed LSCs.** (a) SDS-PAGE gel of LSC lysate. 001= donor 1, 002= donor2, 003= donor 3. (b) Quantification of subcellular localization of lysed LSC proteins. (c) Comparison of cytoplasmic proteins identified in LSC-Sec versus LSC lysate.

**a**

**LSC-Exo Proteome**  
Gene Ontology: Biological Process

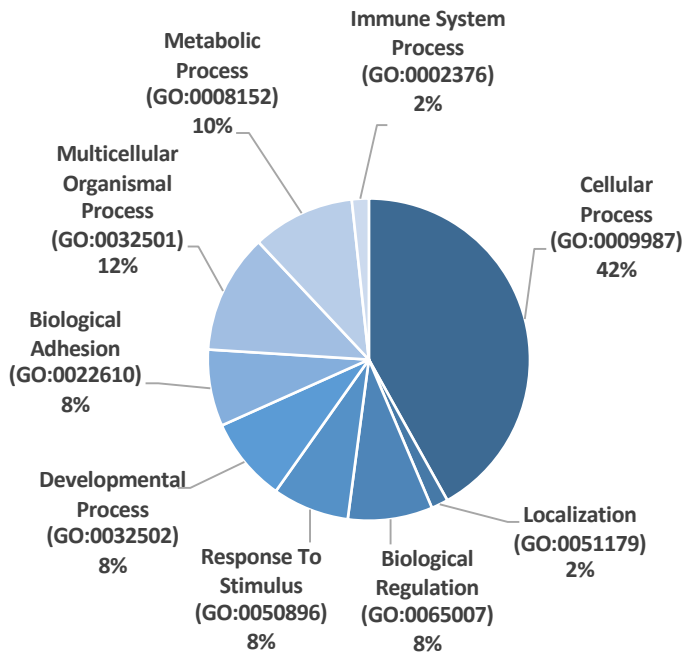**b**

**LSC-Exo Proteome**  
Gene Ontology: Cellular Component

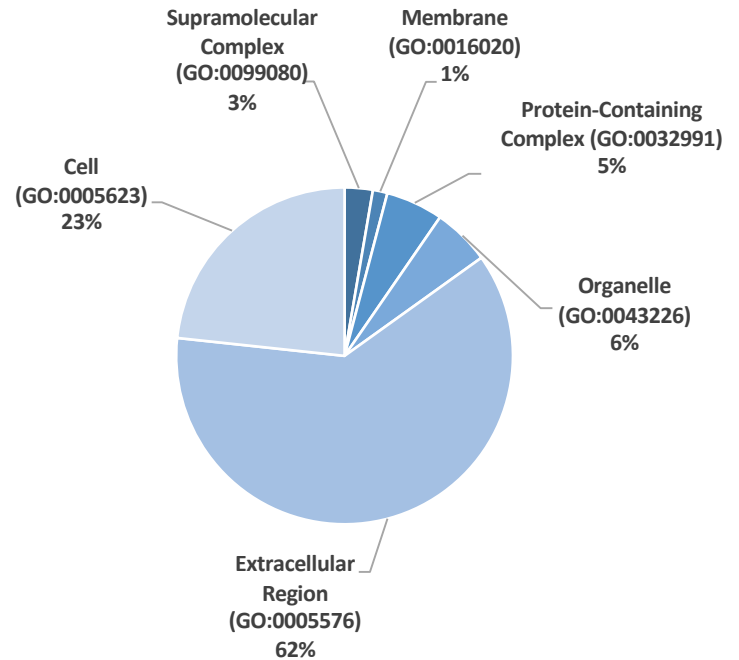**c**

**MSC-Exo Proteome**  
Gene Ontology: Biological Process

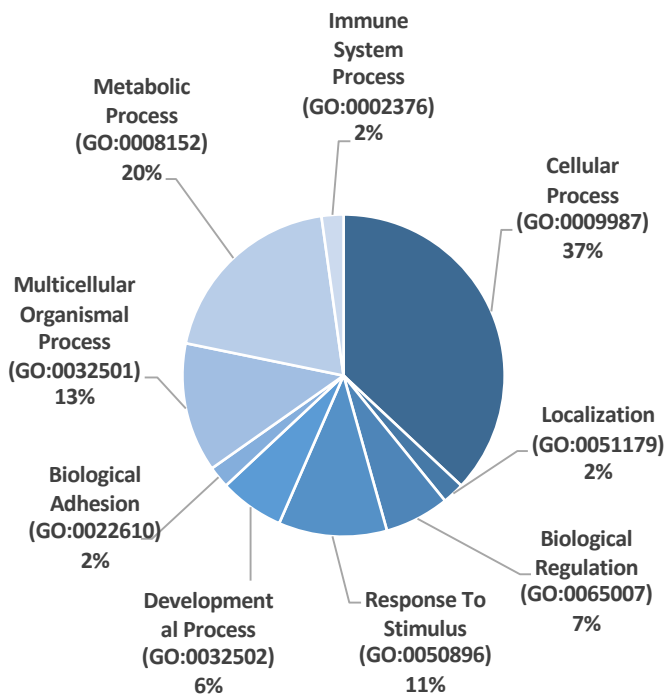**d**

**MSC-Exo Proteome**  
Gene Ontology: Cellular Component

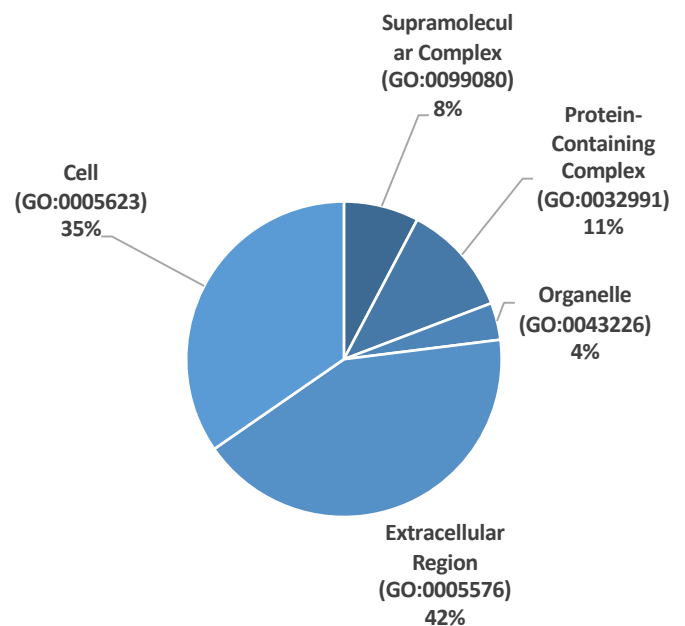

**Supplementary Figure 4. Proteomic analysis of LSC-Exosomes and MSC-Exosomes.** (a) Gene ontology pie chart of biological process associated with LSC-Exo. (b) Gene ontology pie chart of cellular process associated with LSC-Exo. (c) Gene ontology pie chart of biological process associated with MSC-Exo. (d) Gene ontology pie chart of cellular process associated with MSC-Exo.



**a**

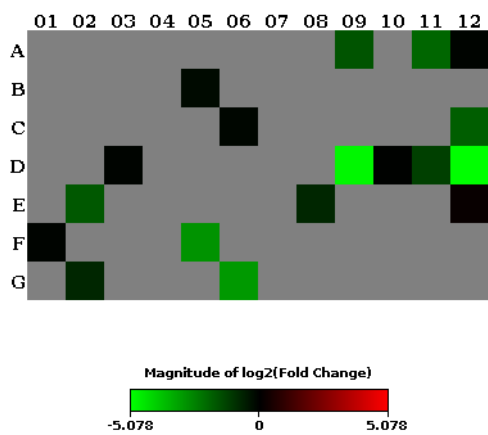

| Layout | 01                           | 02                           | 03                           | 04                          | 05                          | 06                           | 07                           | 08                           | 09                           | 10                           | 11                           | 12                            |
|--------|------------------------------|------------------------------|------------------------------|-----------------------------|-----------------------------|------------------------------|------------------------------|------------------------------|------------------------------|------------------------------|------------------------------|-------------------------------|
| A      | hsa-miR-142-5p<br>1.23<br>C  | hsa-miR-9-5p<br>1.23<br>C    | hsa-miR-150-5p<br>1.23<br>C  | hsa-miR-27b-3p<br>1.23<br>C | hsa-miR-101-3p<br>1.23<br>C | hsa-let-7d-5p<br>1.23<br>C   | hsa-miR-103a-3p<br>1.23<br>C | hsa-miR-16-5p<br>1.23<br>C   | hsa-miR-26a-5p<br>-3.20<br>B | hsa-miR-32-5p<br>1.23<br>C   | hsa-miR-26b-5p<br>-4.08<br>B | hsa-let-7f-5p<br>-1.06<br>B   |
| B      | hsa-miR-30c-5p<br>1.23<br>C  | hsa-miR-96-5p<br>1.23<br>C   | hsa-miR-185-5p<br>1.23<br>C  | hsa-miR-142-3p<br>1.23<br>C | hsa-miR-24-3p<br>-1.14<br>B | hsa-miR-155-5p<br>1.23<br>C  | hsa-miR-146a-5p<br>1.23<br>C | hsa-miR-425-5p<br>1.23<br>C  | hsa-miR-181b-5p<br>1.23<br>C | hsa-miR-302b-3p<br>1.23<br>C | hsa-miR-30b-5p<br>1.23<br>C  | hsa-miR-21-5p<br>1.23<br>C    |
| C      | hsa-miR-30e-5p<br>1.23<br>C  | hsa-miR-200c-3p<br>1.23<br>C | hsa-miR-15b-5p<br>1.23<br>C  | hsa-miR-223-3p<br>1.23<br>C | hsa-miR-194-5p<br>1.23<br>C | hsa-miR-210-3p<br>-1.09<br>B | hsa-miR-15a-5p<br>1.23<br>C  | hsa-miR-181a-5p<br>1.23<br>C | hsa-miR-125b-5p<br>1.23<br>C | hsa-miR-99a-5p<br>1.23<br>C  | hsa-miR-28-5p<br>1.23<br>C   | hsa-miR-320a<br>-3.70<br>B    |
| D      | hsa-miR-125a-5p<br>1.23<br>C | hsa-miR-29b-3p<br>1.23<br>C  | hsa-miR-29a-3p<br>-1.07<br>B | hsa-miR-141-3p<br>1.23<br>C | hsa-miR-19a-3p<br>1.23<br>C | hsa-miR-18a-5p<br>1.23<br>C  | hsa-miR-374a-5p<br>1.23<br>C | hsa-miR-423-5p<br>1.23<br>C  | hsa-let-7a-5p<br>-30.65<br>A | hsa-miR-124-3p<br>-1.03<br>B | hsa-miR-92a-3p<br>-2.41<br>B | hsa-miR-23a-5p<br>-33.77<br>A |
| E      | hsa-miR-25-3p<br>1.23<br>C   | hsa-let-7e-5p<br>-3.34<br>B  | hsa-miR-376c-3p<br>1.23<br>C | hsa-miR-126-3p<br>1.23<br>C | hsa-miR-144-3p<br>1.23<br>C | hsa-miR-424-5p<br>1.23<br>C  | hsa-miR-30a-5p<br>1.23<br>C  | hsa-miR-23b-3p<br>-1.67<br>B | hsa-miR-151a-5p<br>1.23<br>C | hsa-miR-195-5p<br>1.23<br>C  | hsa-miR-143-3p<br>1.23<br>C  | hsa-miR-30c-5p<br>1.11<br>B   |
| F      | hsa-miR-191-5p<br>-1.06<br>B | hsa-let-7f-5p<br>1.23<br>C   | hsa-miR-302a-3p<br>1.23<br>C | hsa-miR-222-3p<br>1.23<br>C | hsa-let-7b-5p<br>-7.66<br>B | hsa-miR-19b-3p<br>1.23<br>C  | hsa-miR-17-5p<br>1.23<br>C   | hsa-miR-93-5p<br>1.23<br>C   | hsa-miR-186-5p<br>1.23<br>C  | hsa-miR-196b-5p<br>1.23<br>C | hsa-miR-27a-3p<br>1.23<br>C  | hsa-miR-22-3p<br>1.23<br>C    |
| G      | hsa-miR-130a-3p<br>1.23<br>C | hsa-let-7c-5p<br>-1.68<br>B  | hsa-miR-29c-3p<br>1.23<br>C  | hsa-miR-140-3p<br>1.23<br>C | hsa-miR-128-3p<br>1.23<br>C | hsa-let-7f-5p<br>-8.27<br>B  | hsa-miR-122-5p<br>1.23<br>C  | hsa-miR-20a-5p<br>1.23<br>C  | hsa-miR-106b-5p<br>1.23<br>C | hsa-miR-7-5p<br>1.23<br>C    | hsa-miR-100-5p<br>1.23<br>C  | hsa-miR-302c-3p<br>1.23<br>C  |
| H      | cel-miR-39-3p<br>1.23<br>C   | cel-miR-38-3p<br>1.23<br>C   | SNORD61<br>1.23<br>C         | SNORD68<br>1.23<br>C        | SNORD72<br>1.23<br>C        | SNORD95<br>1.23<br>C         | SNORD96A<br>1.23<br>C        | RNU6-6P<br>1.23<br>C         | miRTC<br>1.23<br>C           | miRTC<br>1.23<br>C           | PPC<br>1.76                  | PPC<br>1.63                   |

**b**

**Live Cell Uptake**

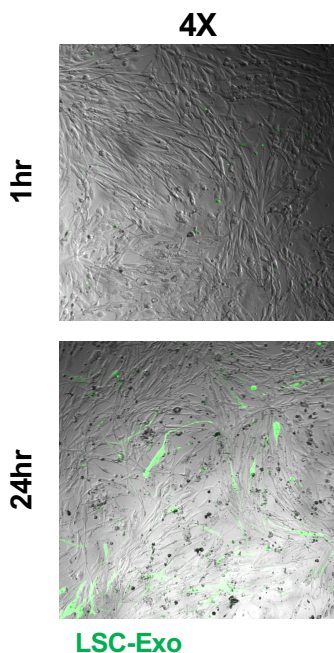

**c**

**Fixed Cell Uptake (24hrs)**

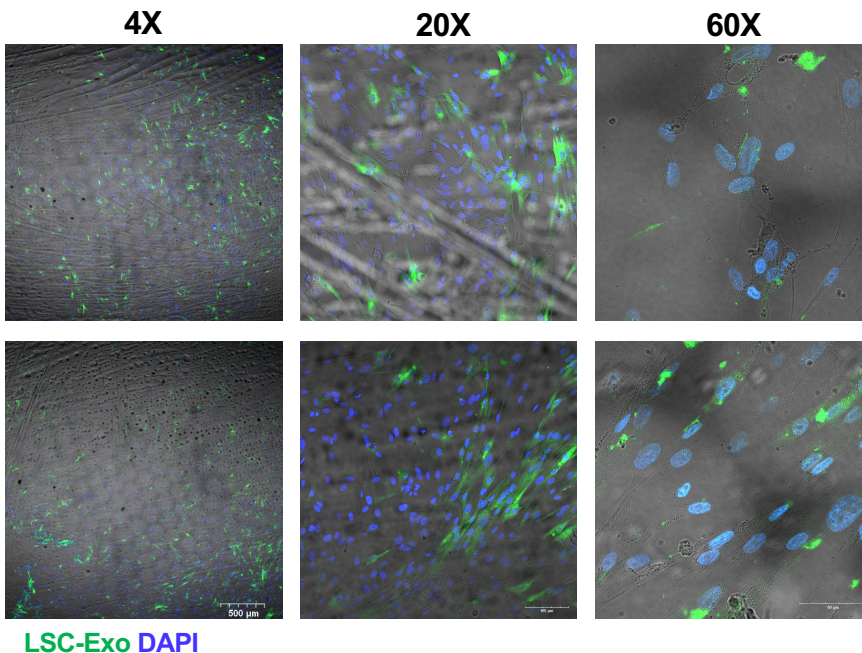

**Supplementary Figure 5. LSC-Exosome analysis for cryostability and cellular uptake. (a)** Heatmap of miRNA microarray analysis of fresh versus frozen LSC-Exo with corresponding plate layout. **(b)** Live cell uptake of DiO labeled LSC-Exo at 1hr and 24hr. **(c)** DiO labeled LSC-Exo with DAPI stained cell nuclei. 4X scale bar= 500µm; 20X scale bar= 100µm; 60X scale bar= 50µm.

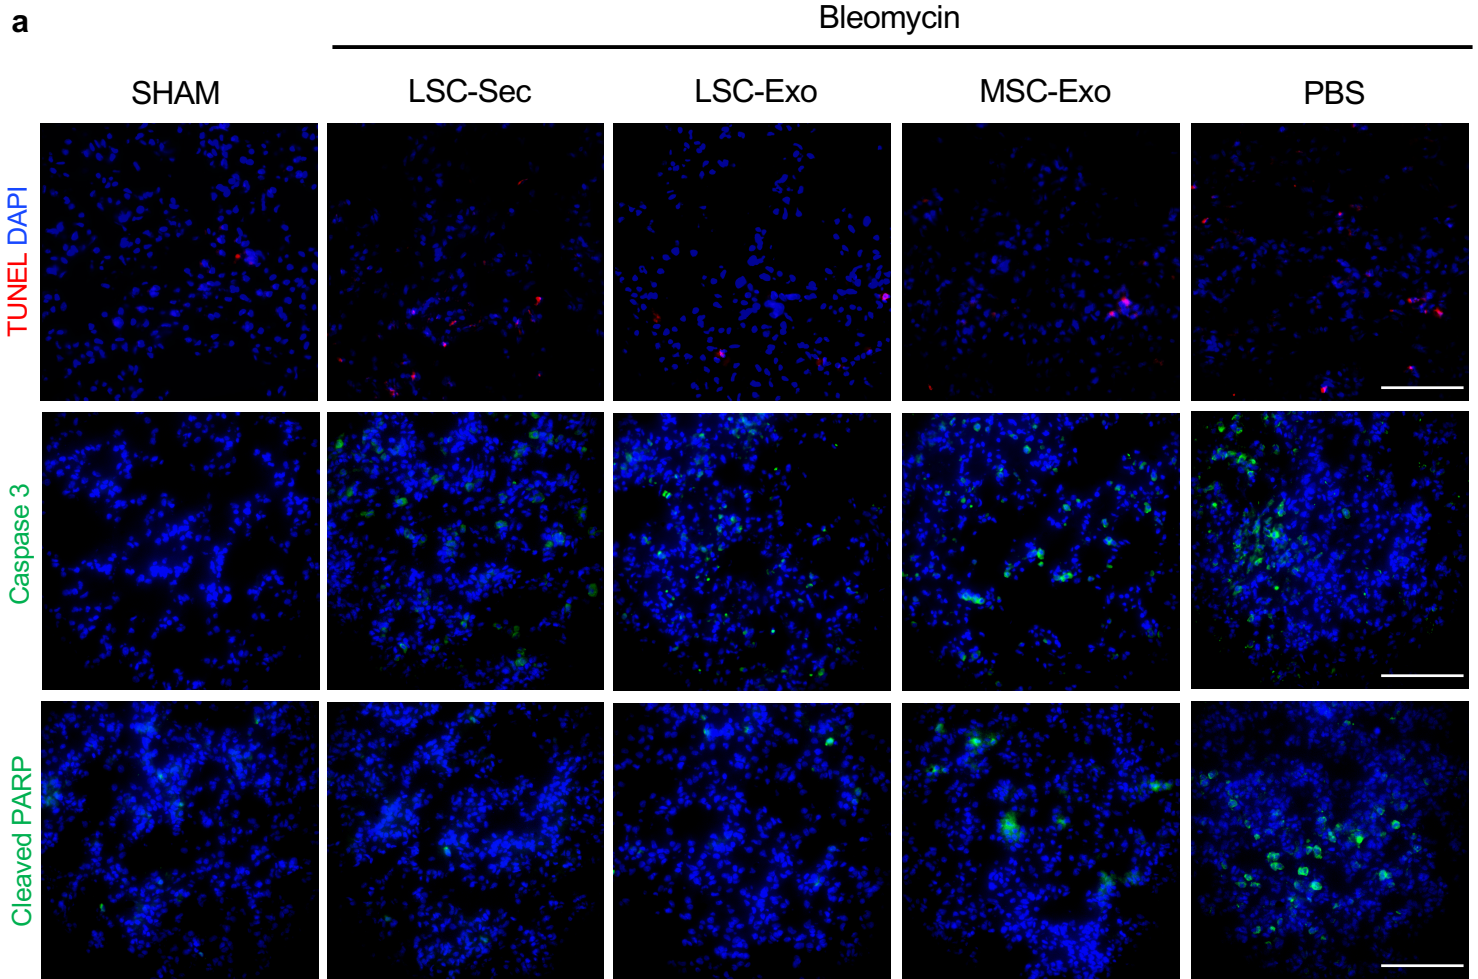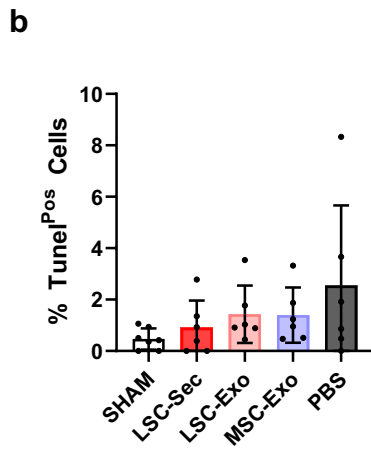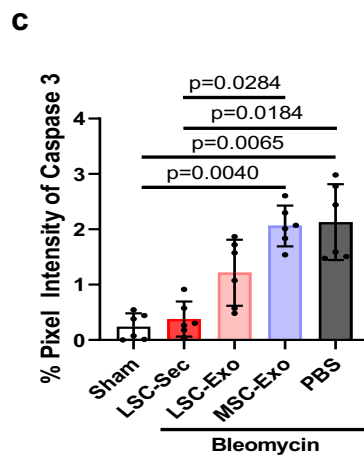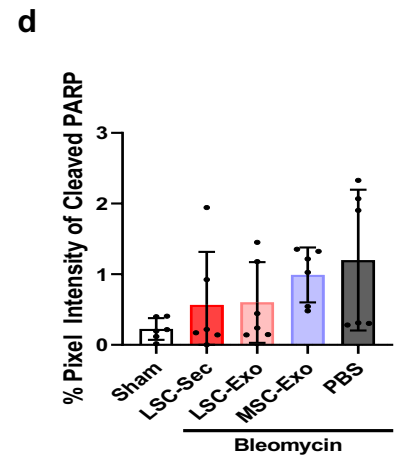

**Supplementary Figure 6. LSC-Exo study immunostained analysis of apoptotic cells.** (a) Representative TUNEL (top), caspase 3 (middle), and cleaved PARP (bottom) immunostained analysis of apoptotic cells for each treatment group (b-d) and quantification of percent of TUNEL positive cells (b), percent pixel intensity of Caspase 3 (c), and percent pixel intensity of cleaved PARP (d); Scale bar= 100 $\mu$ m; each dot represents data from one animal; n=6 biological independent animals. Throughout, data are mean  $\pm$  s.d. P-value as indicated by non-parametric one-way ANOVA. Scale bars= 100 $\mu$ m

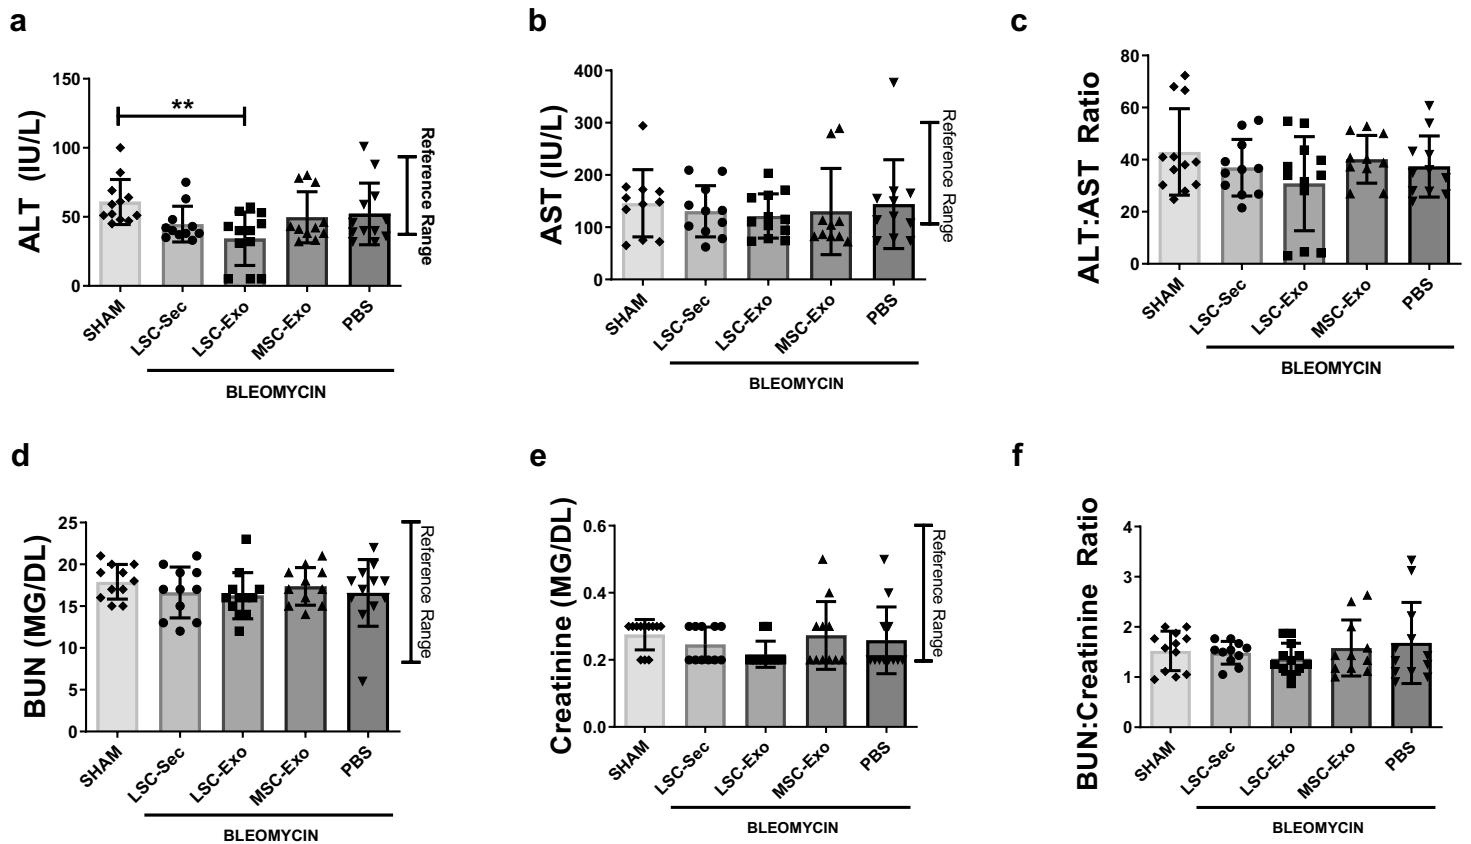

**Supplementary Figure 7. Blood biochemistry analysis.** (a-c) liver enzymes alanine transaminase (ALT) (a), aspartate transaminase (AST) (b), ratio of ALT: AST (c) and (d-f) kidney metabolite blood urea nitrogen (BUN) (d), creatinine (e) and the ratio of BUN: creatinine (f); each data point represents data from one animal; n=11 biological independent animals. Throughout, data are mean  $\pm$  s.d. P-value as indicated by non-parametric one-way ANOVA.

\*\*P $\leq$ 0.01.



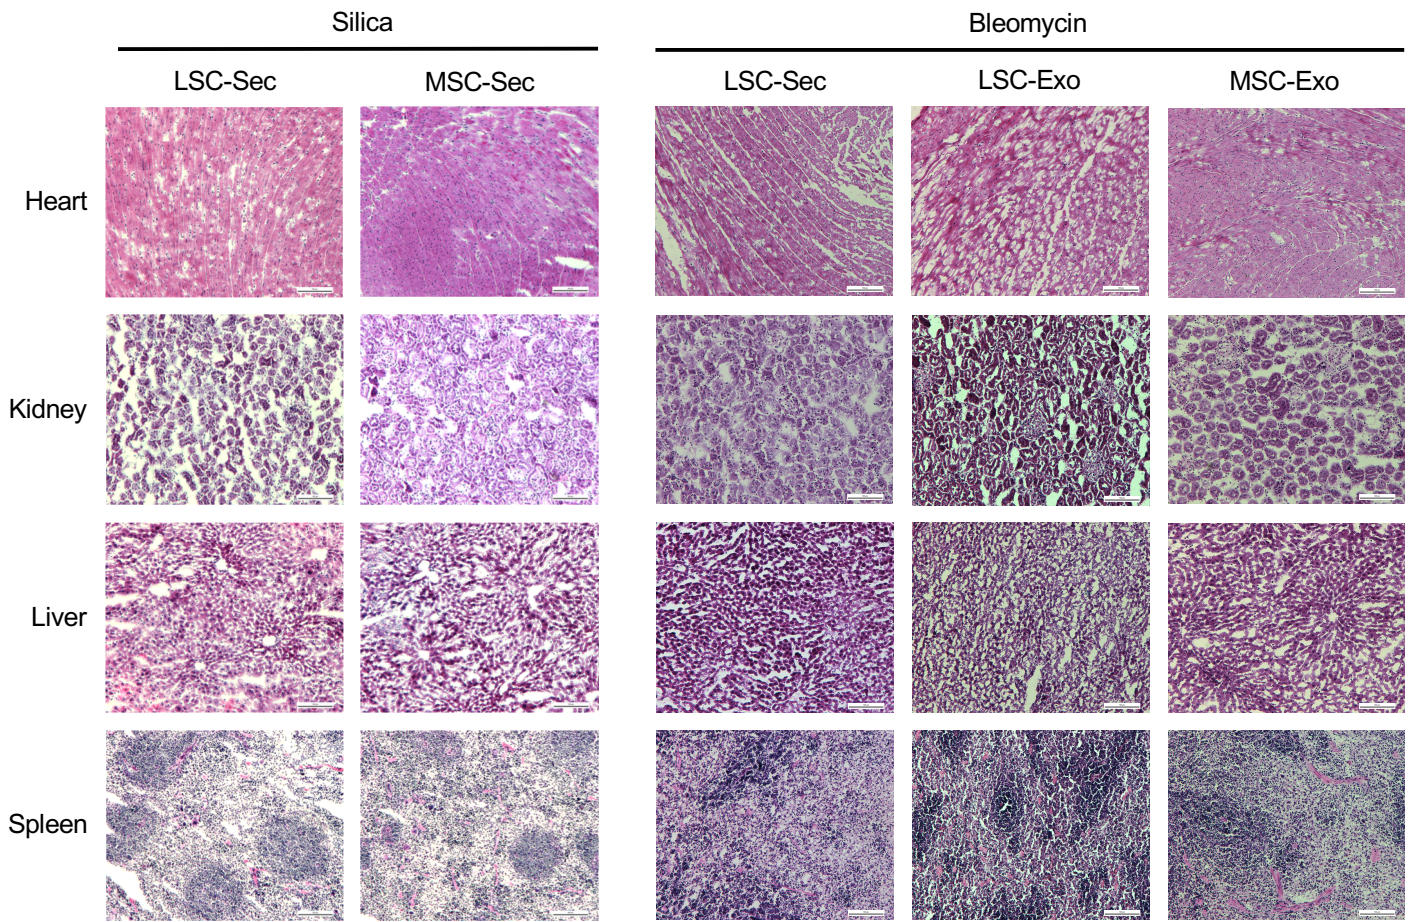

**Supplementary Figure 8. Representative H&E staining of heart, kidney, liver and spleen in secretome and exosome treated animals in both the A/J mice silica study and SD rats bleomycin study showing no tumors.**



**a**

**Global RNA Profile**

**LSC-Exo**

**Distribution of LSC1-Exo miRNAs**

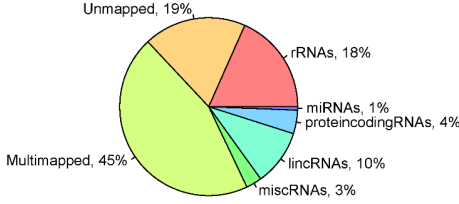

**Distribution of LSC2-Exo miRNAs**

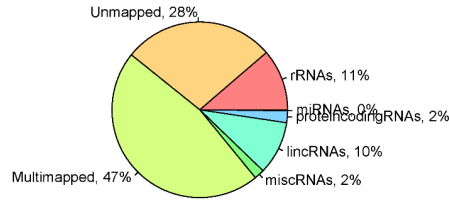

**Distribution of LSC3-Exo miRNAs**

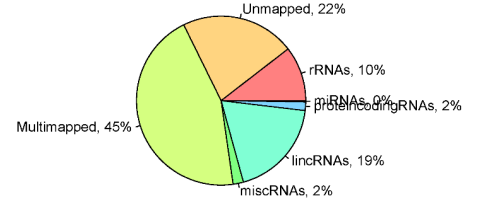

**MSC-Exo**

**Distribution of MSC1-Exo miRNAs**

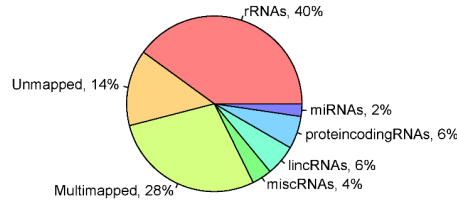

**Distribution of MSC2-Exo miRNAs**

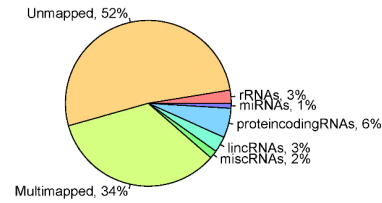

**b**

**MicroRNA Profile**

**LSC-Exo**

**Distribution of LSC1-Exo miRNAs**

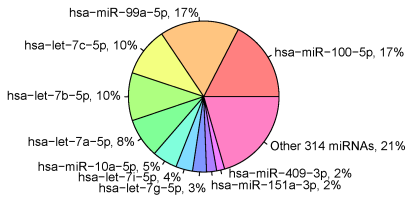

**Distribution of LSC2-Exo miRNAs**

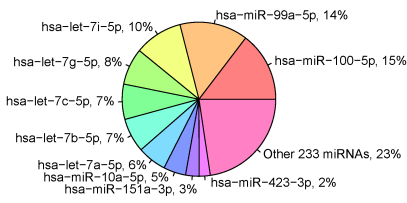

**Distribution of LSC3-Exo miRNAs**

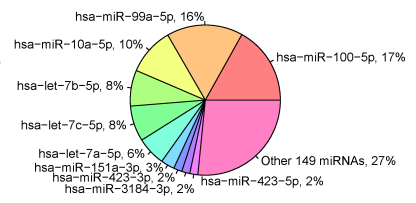

**MSC-Exo**

**Distribution of MSC1-Exo miRNAs**

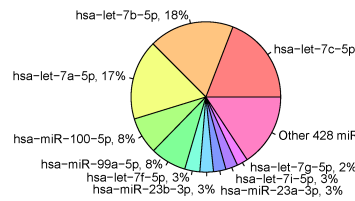

**Distribution of MSC2-Exo miRNAs**

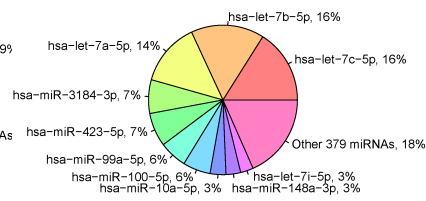

**Supplementary Figure 9. RNA sequencing analysis of LSC-Exo and MSC-Exo samples. (a) Global RNA profile of LSC-Exo from the three donor cell lines and MSC-Exo from two different cell lines. (b) Top 10 miRNAs in each of the exosome samples.**

| <b>Cell Line</b>   | <b>Sex</b> | <b>Age</b> | <b>Race</b> | <b>Smoker</b> | <b>Lung Disease</b> | <b>Cause of Death</b>                                     |
|--------------------|------------|------------|-------------|---------------|---------------------|-----------------------------------------------------------|
| Whole Lung Donor 1 | Female     | 50         | Hispanic    | No            | No                  | Anoxia; 2 <sup>nd</sup> Cardiovascular                    |
| Whole Lung Donor 2 | Female     | 52         | Black       | No            | No                  | Cerebrovascular Accident                                  |
| Whole Lung Donor 3 | Male       | 18         | Hispanic    | No            | No                  | Head Trauma; 2 <sup>nd</sup> Self-Inflicted Gunshot Wound |

**Supplementary Table 1:** Cell Line Donor Information
